# Supplementary material for: Half-lantern cyclometalated Pt(ii) and Pt(iii) complexes with bridging heterocyclic thiolate ligands: synthesis, structural characterization, and electrochemical and photophysical properties
Source: Royal Society of Chemistry journal article supplement (doi:10.1039/c9nj00969h), 2019-01-01
Supplement: c9nj00969h1.pdf [file c9nj00969h1.pdf]

## Electronic Supplementary Information

### **Half-lantern cyclometalated Pt(II) and Pt(III) complexes with bridging heterocyclic thiolate ligands: Synthesis, structural characterization, electrochemical and photophysical properties**

*Hamid R. Shamsavari,<sup>a\*</sup> Elena Lalinde,<sup>b</sup> M. Teresa Moreno,<sup>b\*</sup> Maryam Niazi,<sup>a</sup> Sayed Habib Kazemi,<sup>a</sup> Sedigheh Abedanzadeh,<sup>c</sup> Mohammad Barazandeh,<sup>a</sup> and Mohammad Reza Halvagar<sup>d</sup>*

<sup>a</sup>Department of Chemistry, Institute for Advanced Studies in Basic Sciences (IASBS), Zanjan 45137-66731, Iran.

<sup>b</sup>Departamento de Química-Centro de Síntesis Química de La Rioja, (CISQ), Universidad de La Rioja, 26006, Logroño, Spain.

<sup>c</sup>Institute of Biochemistry and Biophysics (IBB), University of Tehran, Tehran, Iran

<sup>d</sup>Chemistry & Chemical Engineering Research Center of Iran, Tehran, 14968-13151, Iran.

Email: [shamsavari@iasbs.ac.ir](mailto:shamsavari@iasbs.ac.ir); [teresa.moreno@unirioja.es](mailto:teresa.moreno@unirioja.es)

| <b>Contents:</b>                                                                                                                              | <b>Page</b> |
|-----------------------------------------------------------------------------------------------------------------------------------------------|-------------|
| <b>Table S1.</b> Crystal data and structure refinements of complexes <b>1d</b> and <b>2c</b> ·CHCl <sub>3</sub> .                             | 3           |
| <b>Crystal Structure of 1d.</b>                                                                                                               |             |
| <b>Figure S1 (a)</b> ORTEP plot of the structure of <b>1d</b> . <b>(b)</b> top ORTEP view of <b>1d</b> structure along with the Pt···Pt axis. | 4-5         |
| <b>Figure S2.</b> <sup>1</sup> H NMR following experiment for conversion of <b>1a</b> to <b>2a</b> in CDCl <sub>3</sub> at 298 K.             | 6           |
| <b>Figure S3.</b> Normalized absorption spectra of <b>1a-e</b> in the solid state at 298 K.                                                   | 7           |
| <b>Figure S4.</b> Normalized emission spectra of <b>1a-e</b> in CH <sub>2</sub> Cl <sub>2</sub> (5×10 <sup>-5</sup> M) at 298 K.              | 7           |
| <b>References</b>                                                                                                                             | 8           |

**Table S1.** Crystal data and structure refinements of complexes **1d** and **2c**·CHCl<sub>3</sub>.

|                                   | <b>1d</b>                                                                     | <b>2c</b> ·CHCl <sub>3</sub>                                                                                     |
|-----------------------------------|-------------------------------------------------------------------------------|------------------------------------------------------------------------------------------------------------------|
| Formula                           | C <sub>36</sub> H <sub>24</sub> N <sub>4</sub> Pt <sub>2</sub> S <sub>4</sub> | C <sub>30</sub> H <sub>22</sub> Cl <sub>2</sub> N <sub>6</sub> Pt <sub>2</sub> S <sub>2</sub> ·CHCl <sub>3</sub> |
| Formula weight                    | 1030.80                                                                       | 1110.90                                                                                                          |
| T, K                              | 293(2)                                                                        | 293(2)                                                                                                           |
| Crystal system                    | Monoclinic                                                                    | Monoclinic                                                                                                       |
| Space group                       | P2 <sub>1</sub> /c                                                            | P2 <sub>1</sub> /c                                                                                               |
| <i>a</i> (Å)                      | 12.280(3)                                                                     | 10.492(2)                                                                                                        |
| <i>b</i> (Å)                      | 12.690(3)                                                                     | 24.782(5)                                                                                                        |
| <i>c</i> (Å)                      | 21.636(4)                                                                     | 13.530(3)                                                                                                        |
| $\alpha$ (deg)                    | 90                                                                            | 90                                                                                                               |
| $\beta$ (deg)                     | 99.26(3)                                                                      | 99.24(3)                                                                                                         |
| $\gamma$ (deg)                    | 90                                                                            | 90                                                                                                               |
| Z                                 | 4                                                                             | 4                                                                                                                |
| Density, Mg/m <sup>3</sup>        | 2.058                                                                         | 2.125                                                                                                            |
| Reflections collected             | 22128                                                                         | 10780                                                                                                            |
| Independent reflections           | 5767<br>[R(int) = 0.1165]                                                     | 4961<br>[R(int) = 0.1610]                                                                                        |
| Data / restraints / parameters    | 5767 / 0 / 416                                                                | 4961 / 0 / 367                                                                                                   |
| Goodness-of-fit on F <sup>2</sup> | 0.939                                                                         | 1.013                                                                                                            |
| Final R indices<br>[I>2sigma(I)]  | R1 = 0.0278,<br>wR2 = 0.0465                                                  | R1 = 0.0636,<br>wR2 = 0.1529                                                                                     |
| R indices (all data)              | R1 = 0.0676,<br>wR2 = 0.0500                                                  | R1 = 0.0802,<br>wR2 = 0.1588                                                                                     |
| CCDC No.                          | 1820794                                                                       | 1820795                                                                                                          |

## Crystal Structure of **1d**

The ORTEP view of the molecular structure of **1d** is depicted in the Figure S1a and the crystal data and structural refinement parameters from the X-ray single-crystal analysis is summarized in the Table S1. As expected, complex **1d** contains two Pt(ppy) units doubly bridged by two 2-mercaptobenzothiozolate ligands arranging in head-to-tail manner, with short Pt...Pt distance of 2.9423(7) Å, slightly shorter than that found for **1d**·CH<sub>2</sub>Cl<sub>2</sub> [2.9694(3) Å].<sup>1</sup> Each Pt(II) center is located in a slightly distorted planar environment, surrounded by two ppy chelating moieties, while two thiolate ligands link two Pt(II) centers as bridging groups producing structures with *anti*-configuration. However, the strong Pt–C bonds certainly influence their *trans* positions preferring the N-coordination to the S-coordination of the N<sup>^</sup>S ligands and Pt–N distances at the *trans* positions definitely lengthen as expected.<sup>2, 3</sup> Moreover, the crystal packing of complex **1d** displayed no  $\pi\cdots\pi$  ppy intermolecular interactions.

Figure S1b exposes a top ORTEP view of **1d** structure along with the Pt...Pt axis, clearly illustrating an offset arrangement of the upper and lower ppy cyclometalating ligands. This configuration would have certainly effect on the torsion angles of bridging ligands toward the Pt...Pt axis.

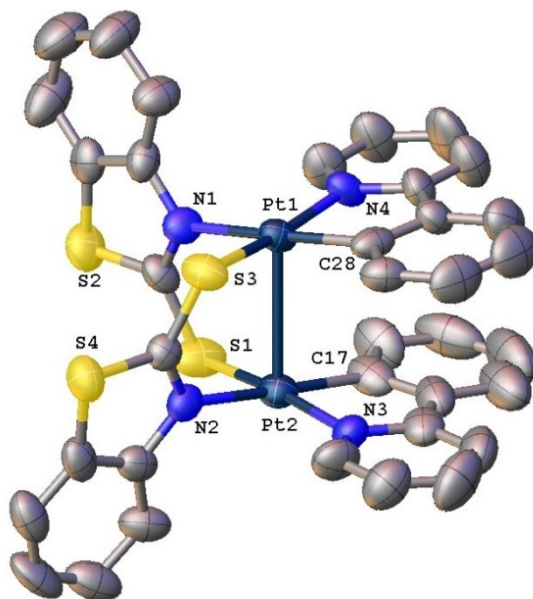

(a)

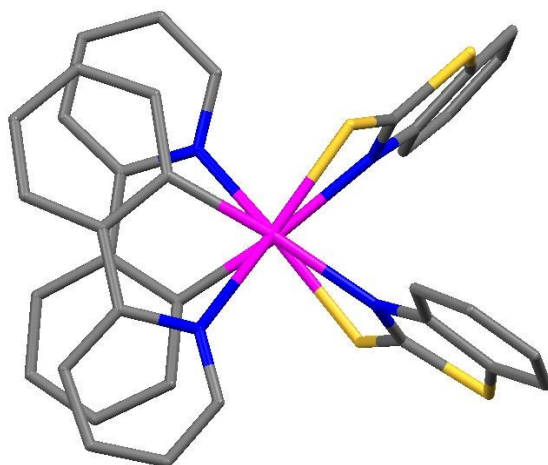

(b)

**Figure S1.** (a) ORTEP plot of the structure of **1d** with the atom labeling scheme. Hydrogen atoms are omitted for clarity. Ellipsoids are drawn at the 30% probability level. Selected bond lengths (Å) and angles (deg): Pt1-Pt2 2.9423(7), Pt1-N4(ppy) 2.051(6), Pt1-S3 2.289(2), Pt1-N1(Spy) 2.141(6), Pt1-C28 1.983(8), N1(Spy)-Pt1-N4(ppy) 93.6(2), N1(Spy)-Pt1-S3 90.71(17), N4(ppy)-Pt1-C28 80.9(3), N1(Spy)-Pt1-Pt2-N2(Spy) 73.4(3), N4(ppy)-Pt1-Pt2-N3(ppy) 100.8(3). (b) Top ORTEP view of **1d** structure along with the Pt...Pt axis.

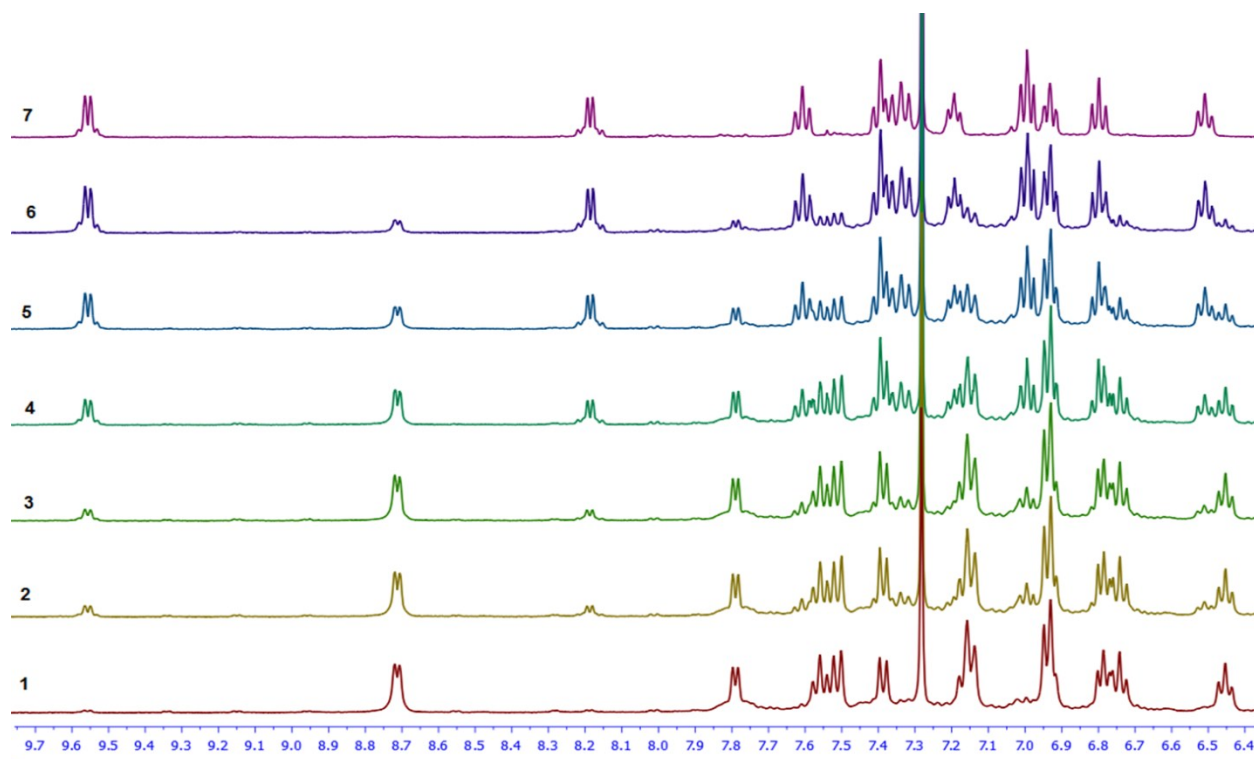

**Figure S2.**  $^1\text{H}$  NMR following experiment for conversion of **1a** to **2a** in  $\text{CDCl}_3$  at 298 K. 1) Complex **1a**, 2) 15 min, 3) 30 min, 4) 1 h, 5) 2 h, 6) 4 h and 7) 6 h after dissolving of **1a** in  $\text{CDCl}_3$ .

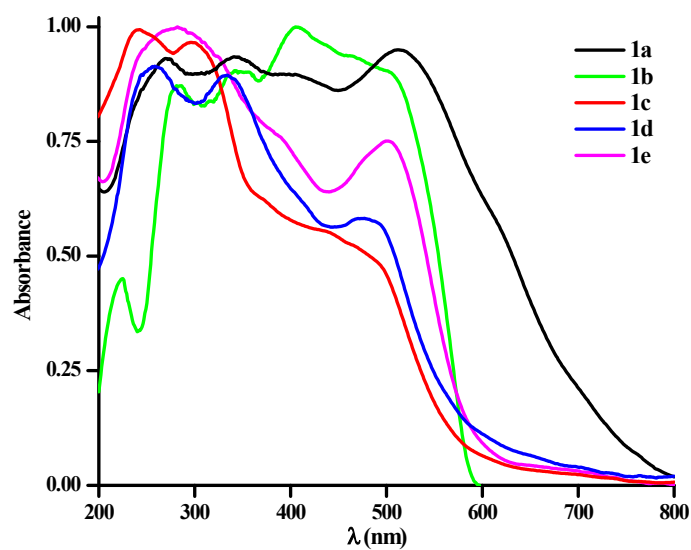

**Figure S3.** Normalized absorption spectra of **1a-e** in the solid state at 298 K.

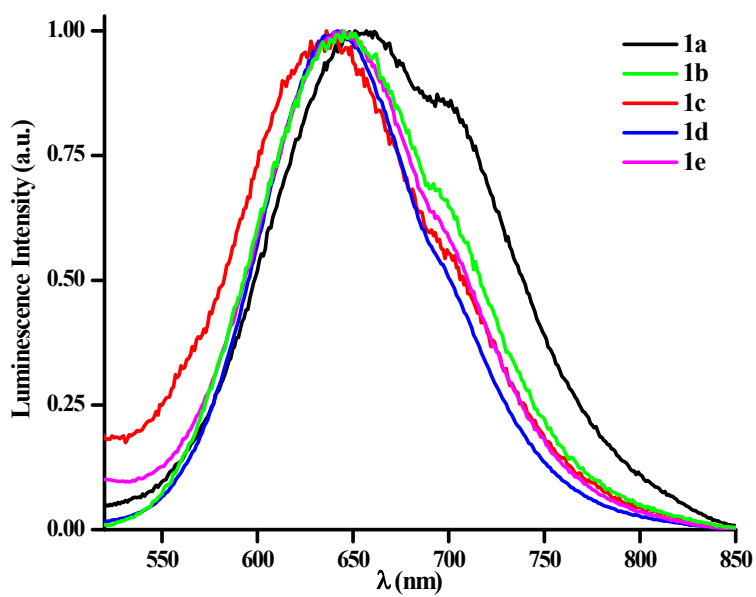

**Figure S4.** Normalized emission spectra of **1a-e** in  $\text{CH}_2\text{Cl}_2$  ( $5 \times 10^{-5}$  M) at 298 K ( $\lambda_{\text{ex}}$  480 nm).

## References:

1. Y. Zhu, K. Luo, L. Zhao, H. Ni and Q. Li, *Dyes Pigm.*, 2017, **145**, 144-151.
2. E. V. Puttock, M. T. Walden and J. A. G. Williams, *Coord. Chem. Rev.*, 2018, **367**, 127-162.
3. M. Yoshida and M. Kato, *Coord. Chem. Rev.*, 2018, **355**, 101-115.
